# Supplementary material for: Selective one-pot chemical recycling of PET waste to xylene monomers: insights into a Ru/TiO2 catalyst design and interfacial dynamics in a biphasic system
Source: Royal Society of Chemistry journal article supplement (doi:10.1039/d4gc04762a), 2025-01-01
Supplement: d4gc04762a1.pdf [file d4gc04762a1.pdf]

**Selective one-pot chemical recycling of PET waste to xylene monomers:  
Insights into Ru/TiO<sub>2</sub> catalyst design and interfacial dynamics in a biphasic  
system**

Vishnu Murali<sup>a</sup>, Hanbyeol Kim<sup>a</sup>, Han Ung Kim<sup>a</sup>, Jung Rae Kim<sup>a</sup>, Sang Hwan Son<sup>a</sup>, Young-  
Kwon Park<sup>b</sup>, Jeong-Myeong Ha<sup>c</sup>, Jungho Jae<sup>a,d,\*</sup>

<sup>a</sup>School of Chemical Engineering, Pusan National University, Busan 46241, Republic of Korea

<sup>b</sup>School of Environmental Engineering, University of Seoul, Seoul 02504, Republic of Korea

<sup>c</sup>Clean Energy Research Center, Korea Institute of Science and Technology, Seoul 02792,  
Republic of Korea

<sup>d</sup>Institute for Environment and Energy, Pusan National University, Busan 46241, Republic of  
Korea

\*Corresponding author: Tel.: +82-51-510-2989; E-mail: [jh.jae@pusan.ac.kr](mailto:jh.jae@pusan.ac.kr) (J. Jae).

## **1. Synthesis of the Ru/TiO<sub>2</sub> catalyst**

The Ru-based nano catalysts were prepared using polyol, wet impregnation and incipient wetness impregnation method with an appropriate amount of an aqueous solution of RuCl<sub>3</sub>.xH<sub>2</sub>O. The obtained samples were dried at 100 °C for 12 h and then reduced in flowing 10 % H<sub>2</sub>/Ar at 400 °C for 4 h.

### **1.1 Synthesis of size-controlled Ru/TiO<sub>2</sub> polyol catalyst**

A sequence of small Ru colloidal nanoparticles (0.5-2.2nm) were produced through an in-situ reduction process with ethylene glycol. Initially, RuCl<sub>3</sub>.xH<sub>2</sub>O was dissolved in ethylene glycol (Sigma–Aldrich), incorporating approximately 1 g of TiO<sub>2</sub>-P25 (Sigma–Aldrich), were added to the mixture, followed by sonication at room temperature for 1 h. The pH of the solution was adjusted to 6 by the addition of NaOH solution. The solution was underwent purged with a gas mixture of 95:5 Ar: H<sub>2</sub> and sonication was carried out under a slow flow of this gas at room temperature for 1h. Then the mixture solution was subjected to heat at 180 °C for 10 min with vigorous string under a 95:5 Ar: H<sub>2</sub> atmosphere. After quenching the reaction, the suspension was subjected to ice bath, followed by ethylene glycol was removed by dilution the suspension with 0.3 M NaNO<sub>3</sub> (Sigma–Aldrich) aqueous solution. Then the solid phase was collected by filtration, washed multiple times with double distilled water and dried at room temperature in vacuum condition. Then the dried samples were reduced in 10 % H<sub>2</sub>/Ar at 400 °C for 4 h.

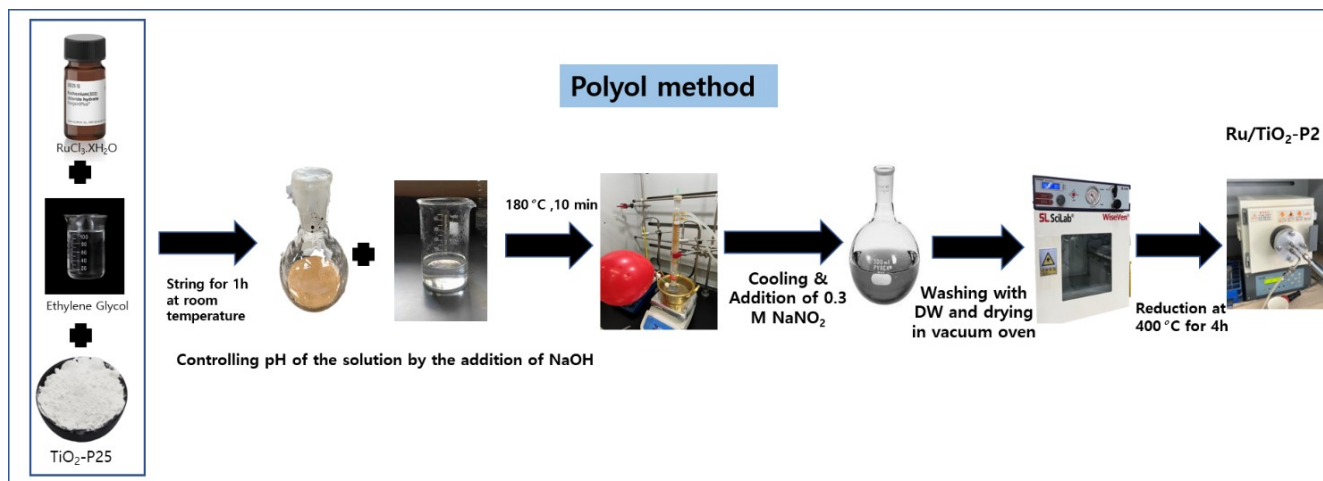

**Fig.S1** Catalyst synthesizes using Polyol method

### 1.1.2 Synthesis of TiO<sub>2</sub>-np and TiO<sub>2</sub>-meso supports

**TiO<sub>2</sub>-np:** First, 5.0 g of titanium(IV) butoxide (Sigma–Aldrich) was mixed with 50 mL of ethylene glycol (99%, Sigma–Aldrich) and agitated at 25 °C for 24 h. Subsequently, 340 mL of acetone and 2.7 mL of deionized water were added, and the mixture was stirred vigorously for an additional 1.5 h at the same temperature. The resulting suspension was centrifuged to separate the solid material from the solvent. The solid was then rinsed thoroughly with ethanol and deionized water to remove residual impurities and dried in an oven at 105 °C overnight. Subsequently, 1 g of the obtained white powder was dispersed in 200 mL of deionized water and heated to 90°C for 1 h with continuous stirring. The suspension was filtered to isolate the solid, which was washed with ethanol and deionized water to ensure purity. The solid was then dried in an oven at 105°C for 24 h. Finally, the dried solid was calcined at 400°C for 3 h to achieve the desired crystalline structure and composition.

**TiO<sub>2</sub>-meso:** In a typical synthesis of mesoporous TiO<sub>2</sub> (TiO<sub>2</sub>-meso), 4 mL of titanium butoxide (Sigma–Aldrich) was mixed with 40 mL of distilled water. The mixture was stirred vigorously for 30 min to ensure complete homogenization of the precursors. The resulting

suspension was then sealed in a 60 mL Teflon-lined autoclave and heated at 200°C for 3 h. After the hydrothermal process, the obtained solid was separated by centrifugation, washed with distilled water, and dried overnight at 100 °C in an oven. Finally, the dried solid was calcined at 400°C for 3 h.

The produced supports were then used for the synthesis of Ru/TiO<sub>2</sub> catalysts using the polyol method in section 2.2.1 (2 wt% Ru/TiO<sub>2</sub>-np-400 and 2 wt% Ru/TiO<sub>2</sub>-meso-400).

### **1.1.3 Synthesis of Ru/TiO<sub>2</sub> catalysts by impregnation**

Ru-based nanocatalysts were also prepared using the wetness impregnation (Wet) and incipient wetness impregnation (IWI) methods with an aqueous solution of RuCl<sub>3</sub>·xH<sub>2</sub>O for comparison with the polyol method. The samples were dried at 100°C for 12 h and then reduced in a 10% H<sub>2</sub>/Ar flow at 400 °C for 4 h.

### **1.1.4 Preparation of Pickering emulsions using Ru/TiO<sub>2</sub> catalysts**

Deionized water and *n*-dodecane were used as the aqueous and organic phases, respectively, to prepare emulsions with various nanohybrid catalysts. First, the catalyst (0.05 g) was dispersed in water (for hydrophilic catalysts) by sonication at 25% amplitude for 15 min. Subsequently, 2.5 mL of *n*-dodecane was added to achieve a water ratio of 1:1 (v/v). The resulting mixture was then sonicated at 50% amplitude for an additional 15 min.<sup>1</sup>

## 2. Calculation methods for the conversion of PET and selectivity of different products in PET HDO reaction.

The PET conversion and selectivity of products were calculated according to the following equations.

$$\begin{aligned} \text{Conversion of PET waste (\%)} \\ &= \frac{\text{Initial weight of PET waste} - \text{The Weight of unreacted PET}}{\text{Initial weight of PET waste}} \\ &* 100 \quad (1) \end{aligned}$$

$$\begin{aligned} \text{The weight of unreacted PET} \\ &= \text{The weight of residual solid (g)} - \text{Introduced catalyst amount (g)} \\ &\quad (2) \end{aligned}$$

$$\text{Selectivity [\% C]} = \frac{\text{Amount of each products [mol - C]}}{\Sigma \text{Amount of products [mol - C]}} * 100 \quad (3)$$

$$\text{Yield [\% C]} = \frac{\text{Conersion} * \text{Selectivity}}{100} \quad (4)$$

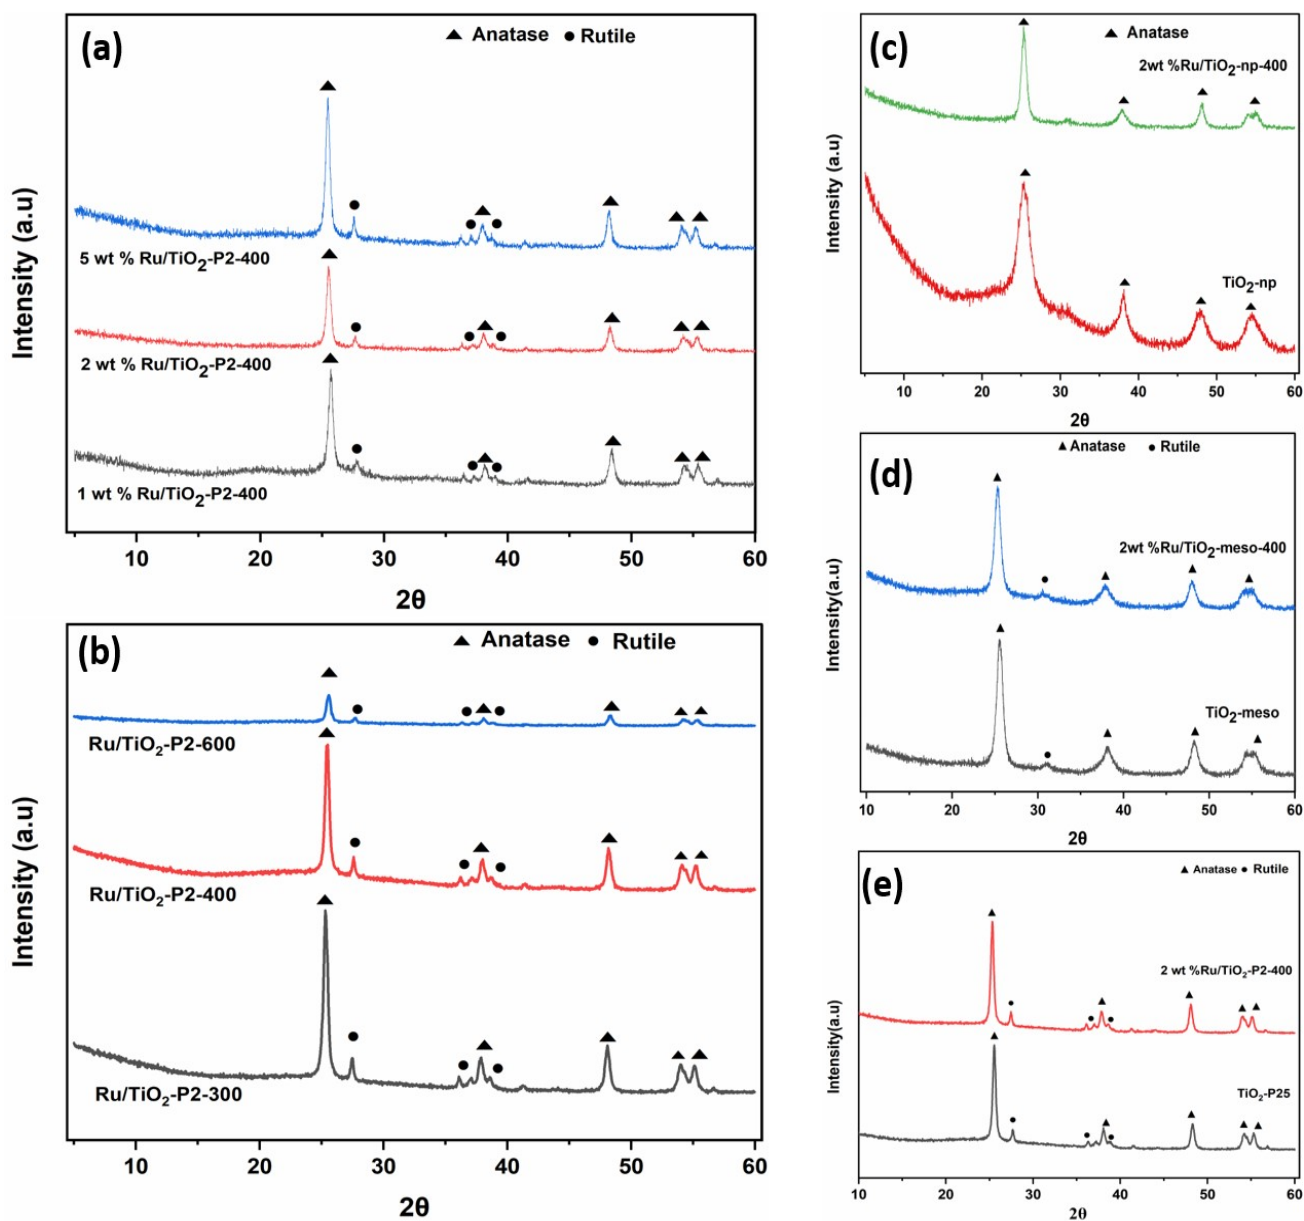

**Fig. S2** XRD patterns of: a) 1, 2, and 5 wt% Ru/TiO<sub>2</sub>-P2-400, b) 2 wt% Ru/TiO<sub>2</sub>-P2-(300,400,600), c) 2 wt% Ru/TiO<sub>2</sub>-np-400, d) 2 wt% Ru/TiO<sub>2</sub>-meso-400, and e) 2 wt% Ru/TiO<sub>2</sub>-P2-400.

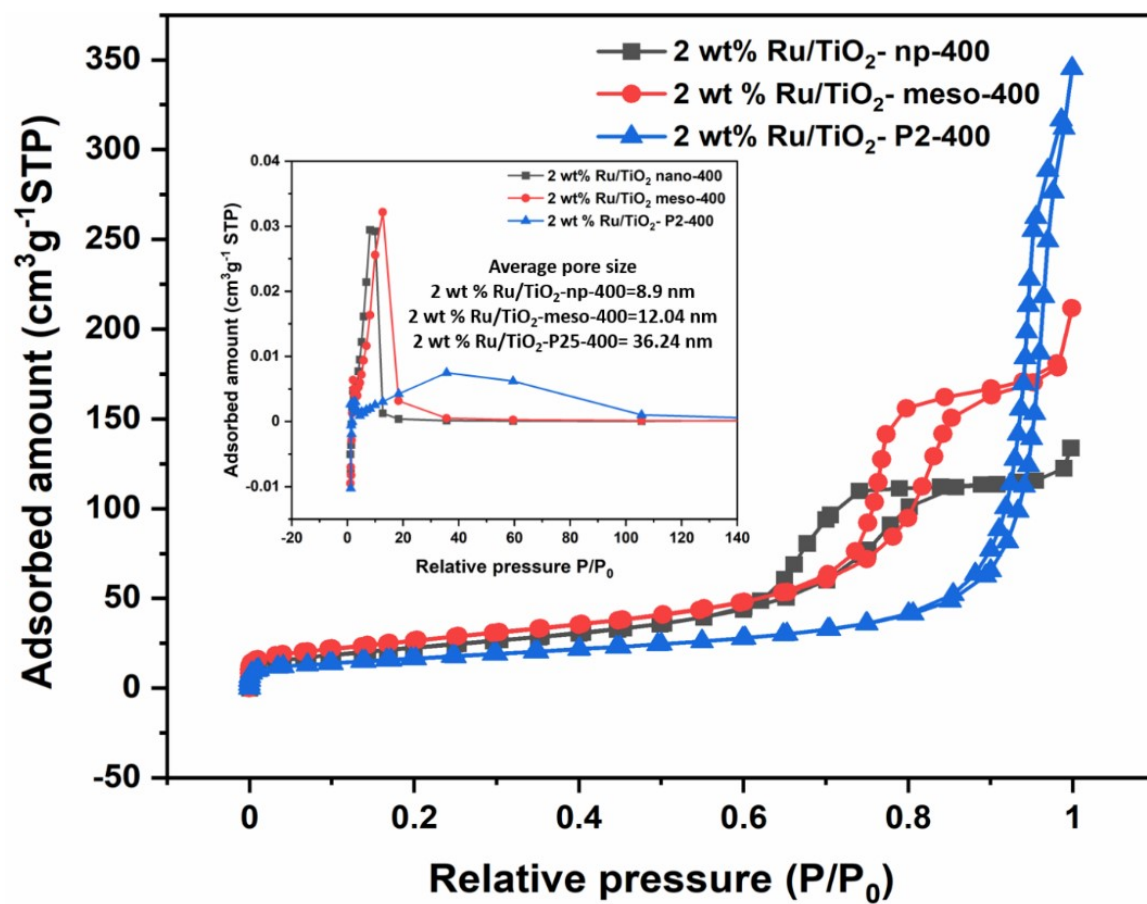

**Fig. S3** N<sub>2</sub> adsorption-desorption isotherms and BJH pore size distributions of 2 wt% Ru/TiO<sub>2</sub>-(np,meso,P2)-400.

**Table S1** Textural properties of Ru/TiO<sub>2</sub> catalysts estimated from N<sub>2</sub> adsorption–desorption isotherms.

| Catalyst                              | $S_{\text{BET}}$<br>(m <sup>2</sup> /g) | $V_{\text{pore}}$<br>(cm <sup>3</sup> /g) | $V_{\text{micro}}$<br>(cm <sup>3</sup> /g) | $V_{\text{meso}}$<br>(cm <sup>3</sup> /g) | $D_{\text{meso}}$<br>(nm) |
|---------------------------------------|-----------------------------------------|-------------------------------------------|--------------------------------------------|-------------------------------------------|---------------------------|
| 5 wt % Ru/TiO <sub>2</sub> -P2-400    | 63.95                                   | 0.48                                      | -                                          | 0.48                                      | 30.35                     |
| 2 wt % Ru/TiO <sub>2</sub> -P2-400    | 58.66                                   | 0.48                                      | -                                          | 0.48                                      | 36.24                     |
| 1 wt % Ru/TiO <sub>2</sub> -P2-400    | 54.67                                   | 0.56                                      | -                                          | 0.56                                      | 33.38                     |
| 2 wt % Ru/TiO <sub>2</sub> -P2-300    | 57.18                                   | 0.46                                      | -                                          | 0.46                                      | 33.43                     |
| 2 wt % Ru/TiO <sub>2</sub> -P2-600    | 36.64                                   | 0.44                                      | -                                          | 0.44                                      | 41.32                     |
| 2 wt % Ru/TiO <sub>2</sub> -np-400    | 85.18                                   | 0.38                                      | 0.18                                       | 0.2                                       | 8.9                       |
| 2 wt % Ru/TiO <sub>2</sub> – meso-400 | 79.29                                   | 0.3                                       | 0.1                                        | 0.29                                      | 12.04                     |

- $S_{\text{BET}}$ : BET surface area

- $V_{\text{pore}}$ : Single-point-desorption total pore volume ( $P/P_0 = 0.99$ ).

- $V_{\text{micro}}$ : Single-point-desorption micropore volume ( $P/P_0 = 0.20$ ).

- $V_{\text{meso}}$ :  $V_{\text{pore}} - V_{\text{micro}}$

- $D_{\text{meso}}$ : Mean mesopore diameter obtained via the BJH method.

**Table S2** Properties of emulsion droplets in Ru/TiO<sub>2</sub> supports.

| Catalyst                                 | Mean droplet distance (μm) | Mean droplet size(μm) |
|------------------------------------------|----------------------------|-----------------------|
| <b>2wt % Ru/TiO<sub>2</sub>-np-400</b>   | 35.82                      | 4.5                   |
| <b>2wt % Ru/TiO<sub>2</sub>-meso-400</b> | 14.64                      | 9                     |
| <b>2wt % Ru/TiO<sub>2</sub>-P2-400</b>   | 8.12                       | 25                    |

The droplet distance and droplet size was measured using the optical spectroscope software.



**Table S3** Product distribution for PET hydrogenolysis over monophasic and biphasic systems. (Reaction condition: 0.5 g catalyst + 0.5 g PET water (monophasic and biphasic (water: n-dodecane (1:1) system), 220 °C, 10 bar H<sub>2</sub>, 12 h. Selectivity of the product (C mol %).

| No | Catalyst                            | Ben   | Tol   | Xyl   | Cyclohexane (Cyc) | Methyl Cyc | Dimethyl Cyc | Cyc Methanol | 4-Methyl Cyc Methanol | Cyc Dicarboxylic Acid | Conv. (%) |
|----|-------------------------------------|-------|-------|-------|-------------------|------------|--------------|--------------|-----------------------|-----------------------|-----------|
| 1  | 2wt % Ru/TiO <sub>2</sub> -np-400   | 0     | 1.46  | 22.81 | 21.92             | 41.74      | 10.46        | 0            | 0                     | 0                     | 88.34     |
| 2  | 2wt % Ru/TiO <sub>2</sub> -P2-400   | 13    | 49.47 | 29.11 | 5.2               | 3.2        | 0            | 0            | 0                     | 0                     | 81.52     |
| 3  | 2wt % Ru/TiO <sub>2</sub> -Meso-400 | 67.07 | 26.35 | 6.57  | 0                 | 0          | 0            | 0            | 0                     | 0                     | 64.34     |
| 4  | 1 wt % Ru/TiO <sub>2</sub> -P2-400  | 37.54 | 49.47 | 12.9  | 0                 | 0          | 0            | 0            | 0                     | 0                     | 71.56     |
| 5  | 5 wt % Ru/TiO <sub>2</sub> -P2-400  | 22.76 | 52.58 | 10.81 | 13.85             | 0          | 0            | 0            | 0                     | 0                     | 88.52     |
| 6  | 2wt % Ru/TiO <sub>2</sub> -imp-400  | 0     | 25.42 | 32.18 | 17.83             | 20.41      | 2.56         | 0.74         | 0.84                  | 0                     | 84.62     |
| 7  | 2 wt % Ru/TiO <sub>2</sub> -Wet-400 | 9.2   | 7.64  | 2.13  | 0                 | 0          | 0            | 0            | 0                     | 81.02                 | 90.71     |
| 8  | 2wt % Ru/TiO <sub>2</sub> -P2-300   | 55.83 | 37.68 | 6.47  | 0                 | 0          | 0            | 0            | 0                     | 0                     | 86.6      |
| 9  | 2wt % Ru/TiO <sub>2</sub> -P2-600   | 34.07 | 44.12 | 8.11  | 13.6              | 0          | 0            | 0            | 0                     | 0                     | 84.2      |

### 3. Product distribution for PET HDO over 2 wt% Ru/TiO<sub>2</sub>-np-400 and 2 wt% Ru/TiO<sub>2</sub>-meso-400

To understand the product distribution for PET HDO over 2 wt% Ru/TiO<sub>2</sub>-np-400 and 2 wt% Ru/TiO<sub>2</sub>-meso-400, we conducted a time series analysis. (Fig. S4) shows the product distributions for these Ru/TiO<sub>2</sub> catalysts over a period of 2–8 h. The kinetic profile for the 2 wt% Ru/TiO<sub>2</sub>-np-400 catalyst (Fig. S4a) indicates that PET conversion reached 64.32% after 8 h. During the initial stage of the reaction (2 h), the primary products were a mixture of oxygenated aromatic and cyclic hydrocarbons, specifically product 13 (cyclohexane carboxylic acid) and product 10 (*p*-toluic acid), with selectivities of 34.0% and 27.6%, respectively. As the reaction progressed to 4 h, the selectivities for products 10 and 13 gradually decreased, whereas those for products 12, 11, and 8 increased, indicating hydrogenolysis of the acid groups to form the corresponding alcohols. At this stage, the total selectivity for oxygenated cyclic hydrocarbons (~46.2%) was higher than that for oxygenated aromatics (~33.2%), suggesting that ring hydrogenation of oxygenated aromatics was favored. At 6 h, ring hydrogenation became more pronounced, and hydrogenolysis resulted in the formation of deoxygenated cyclic hydrocarbons (products 4–6) with a selectivity of 20.9%, which increased to 32.61% at 8 h. The total selectivity for cyclic hydrocarbons (32.61%) was much higher than that for BTX (~13%, mainly xylenes), suggesting that the small size of TiO<sub>2</sub>-np enhanced the rate of ring hydrogenation. In addition, the cyclohexane selectivity was quite high (~10.22%), indicating that a high degree of decarboxylation occurred on TiO<sub>2</sub>-np. The reaction network for PET HDO is shown in (Fig. S4 c). Based on the time evolution of the intermediates with the TiO<sub>2</sub>-np support, PET is initially converted to a decarboxylated product (mainly benzoic acid) and subsequently undergoes ring hydrogenation to form cyclohexane carboxylic acid, which further decarboxylates and undergoes hydrogenolysis to produce cyclohexane and methyl cyclohexane.

In the case of 2 wt% Ru/TiO<sub>2</sub>-meso-400 (Fig. S4b), PET conversion reached 42.57% after 8 h. During the initial 2 h period, the major products were products 10 and 9 (benzoic acid) with selectivities of 30.8% and 33.9%, respectively. The high selectivity for product 9 indicates that large number of hydroxyl groups on the TiO<sub>2</sub>-meso support enhanced the decarboxylation rate. After 4 h, the selectivity for BTX gradually increased. However, the selectivity for benzene was higher compared to xylene and toluene, suggesting that decarboxylation was greatly enhanced on the TiO<sub>2</sub>-meso support. At 8 h, the benzene selectivity was 41.92%, while the selectivities for toluene and xylene were 19.0% and 8.1%, respectively. This demonstrates that TiO<sub>2</sub>-meso effectively promoted the formation of decarboxylated products rather than promoting hydrogenolysis.

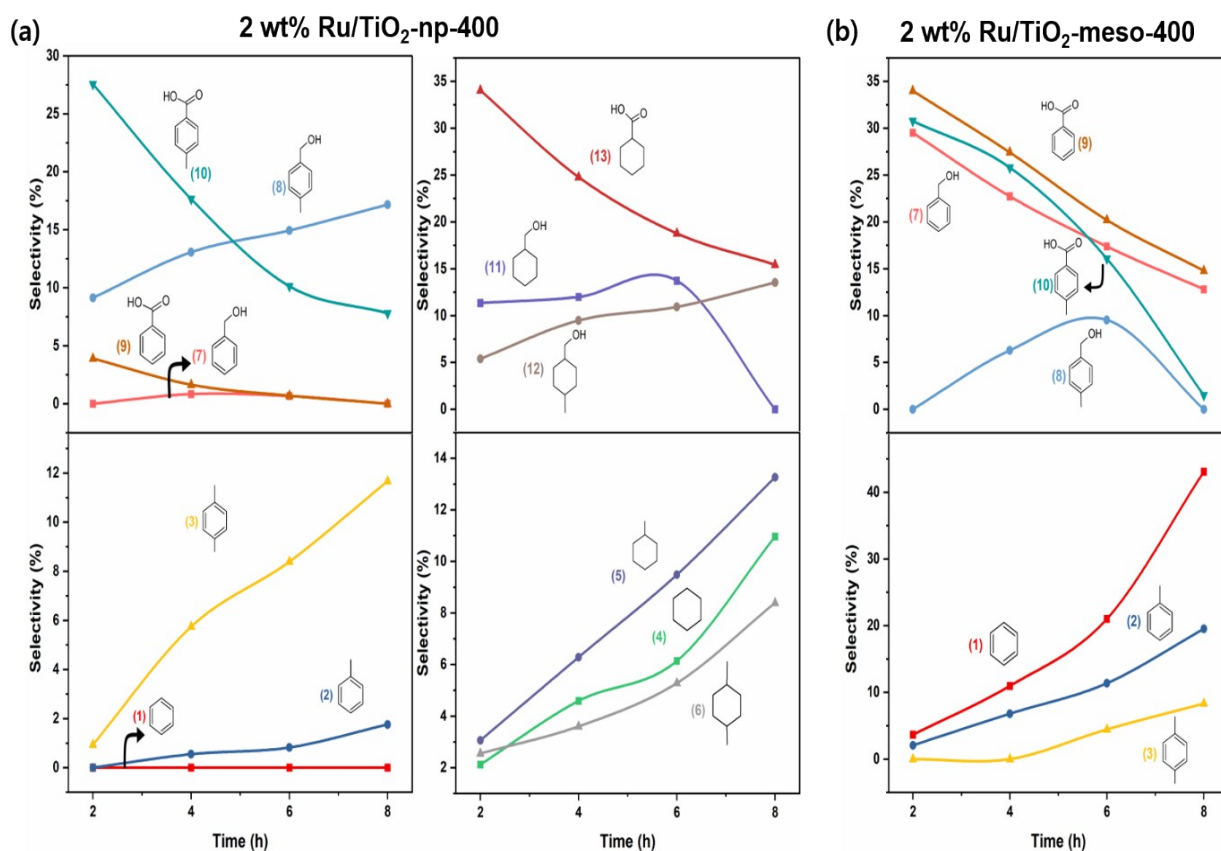

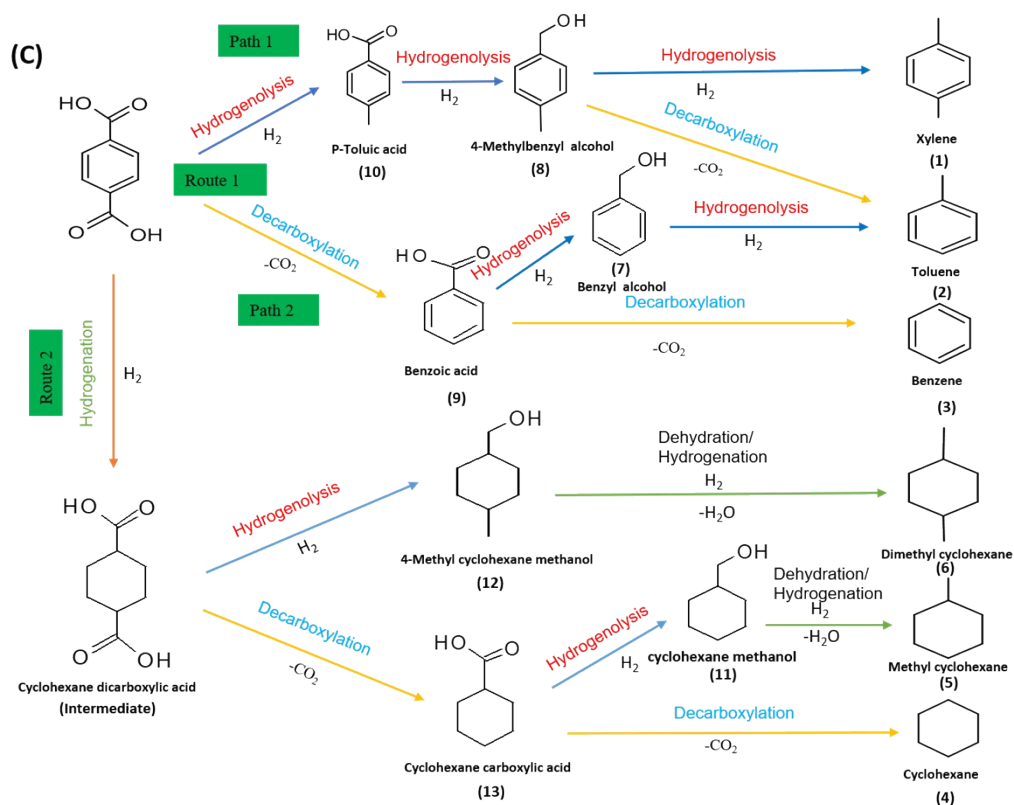

**Fig. S4** Time series analysis of the effect of different TiO<sub>2</sub> supports on the PET HDO reaction: (a,b) product distribution for PET hydrogenolysis in a biphasic system (water:*n*-dodecane (1:1, v/v)) over 2 wt% Ru/TiO<sub>2</sub>-np-400 and 2 wt% Ru/TiO<sub>2</sub>-meso-400 (reaction conditions: 0.5 g of catalyst and 0.5 g of PET in 50 g of water + *n*-dodecane, 220 °C, 10 bar H<sub>2</sub>, 8 h). (c) Reaction pathway of PET HDO over Ru/TiO<sub>2</sub>-(np,meso).



#### 4. PET HDO reaction

We conducted to understand the catalytic activity of Ru/TiO<sub>2</sub> catalyst in a biphasic system. for understanding more detail, the obtained product were classified as 0-Os hydrocarbons, aromatics, 1-Os hydrocarbons, or 2–4-Os hydrocarbons, as shown in Fig. S3.

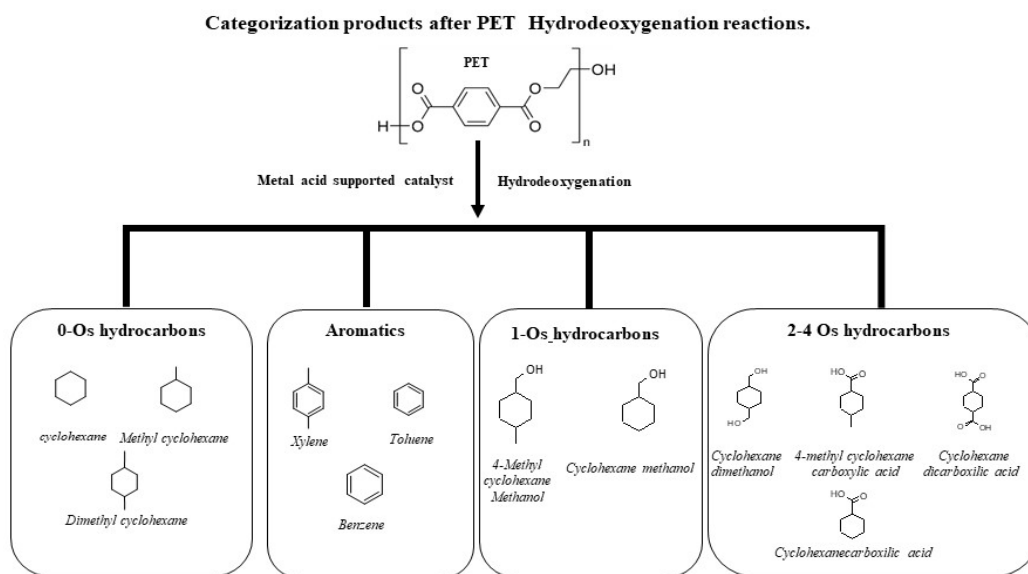

**Fig.S5** Categorization of product after PET HDO reaction

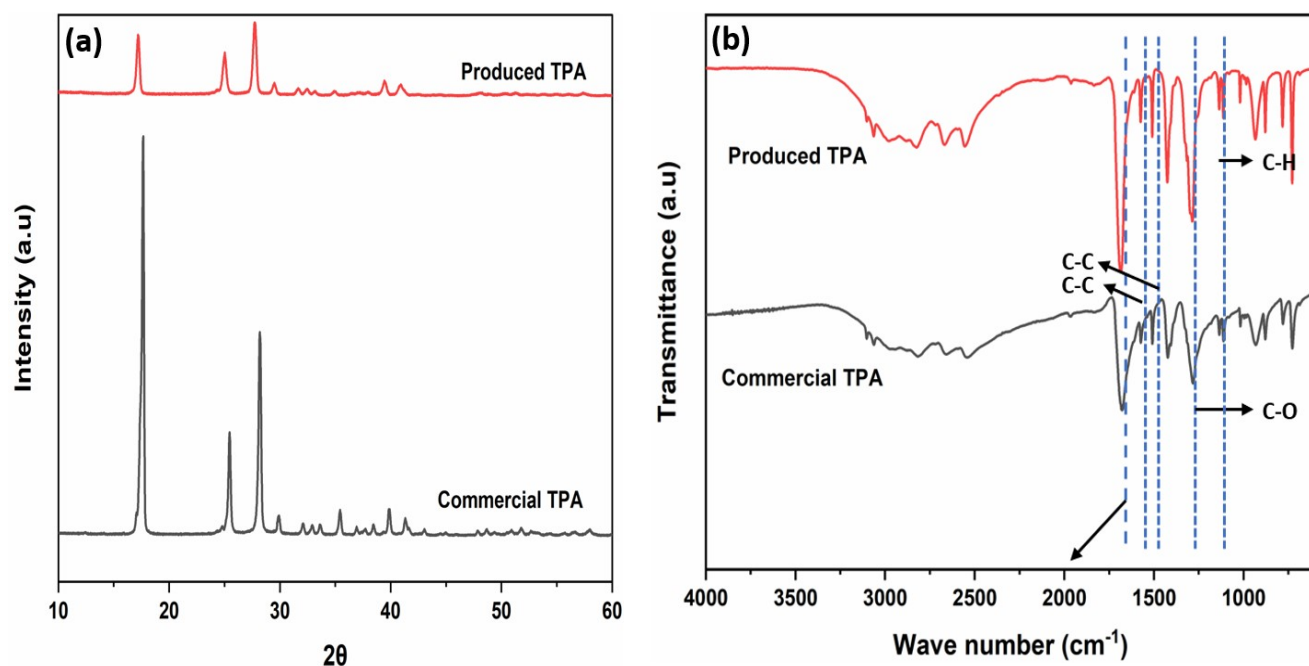

**Fig. S6** a) XRD data of TPA produced by Ru/TiO<sub>2</sub> catalyst in water phase, b) FTIR data of produced TPA by Ru/TiO<sub>2</sub> catalyst in water phase. (Reaction condition: 0.5 g PET + 0.5 g catalyst, 220 °C, 2 h, 10 bar H<sub>2</sub>, 50 g water)

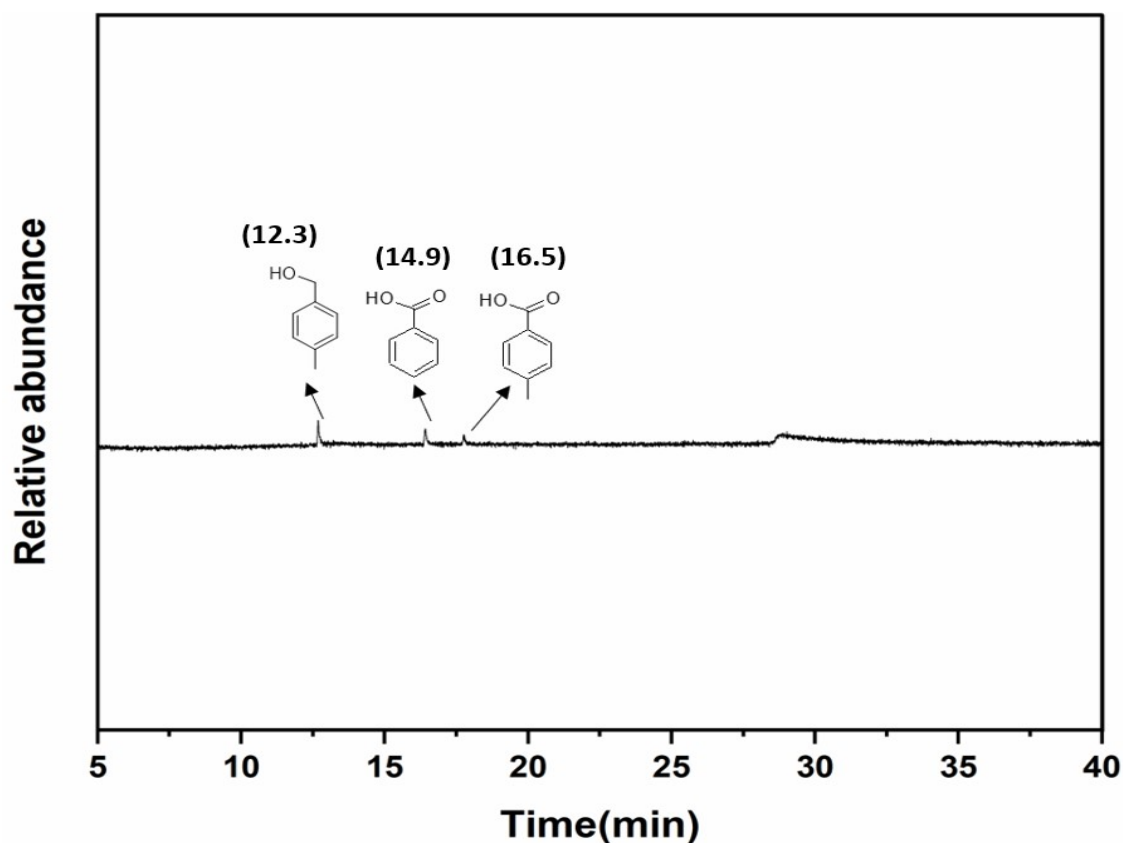

**Fig. S7** GC-MS analysis of the PET HDO over Ru/TiO<sub>2</sub> catalyst in water phase system.

*(Reaction condition: 0.5 g PET + 0.5 g catalyst, 220 °C, 4 h, 10 bar H<sub>2</sub>, water : n-dodecane (1:1))*

## 5. Hydrogen solubility in water and dodecane.

The solubility of hydrogen in water phase at room temperature is relatively high. At standard condition (25 and 1 atm pressure) The solubility of hydrogen in dodecane is relatively low. According to the previous studies. We formulate the table of solubilities of hydrogen in water and dodecane phase. (Table. S2)



**Table S4** Solvent polarity index and H<sub>2</sub> solubility in different solvent (25 C and 1 atm pressure)<sup>2, 3</sup>

| Solvent    | Polarity | H <sub>2</sub> solubility<br>(mol cm <sup>-3</sup> ) | ref  |
|------------|----------|------------------------------------------------------|------|
| Water      | 9.0      | 7.8*10 <sup>-7</sup>                                 | 2, 3 |
| n-Dodecane | 0.3      | 4.7*10 <sup>-6</sup>                                 | 4    |

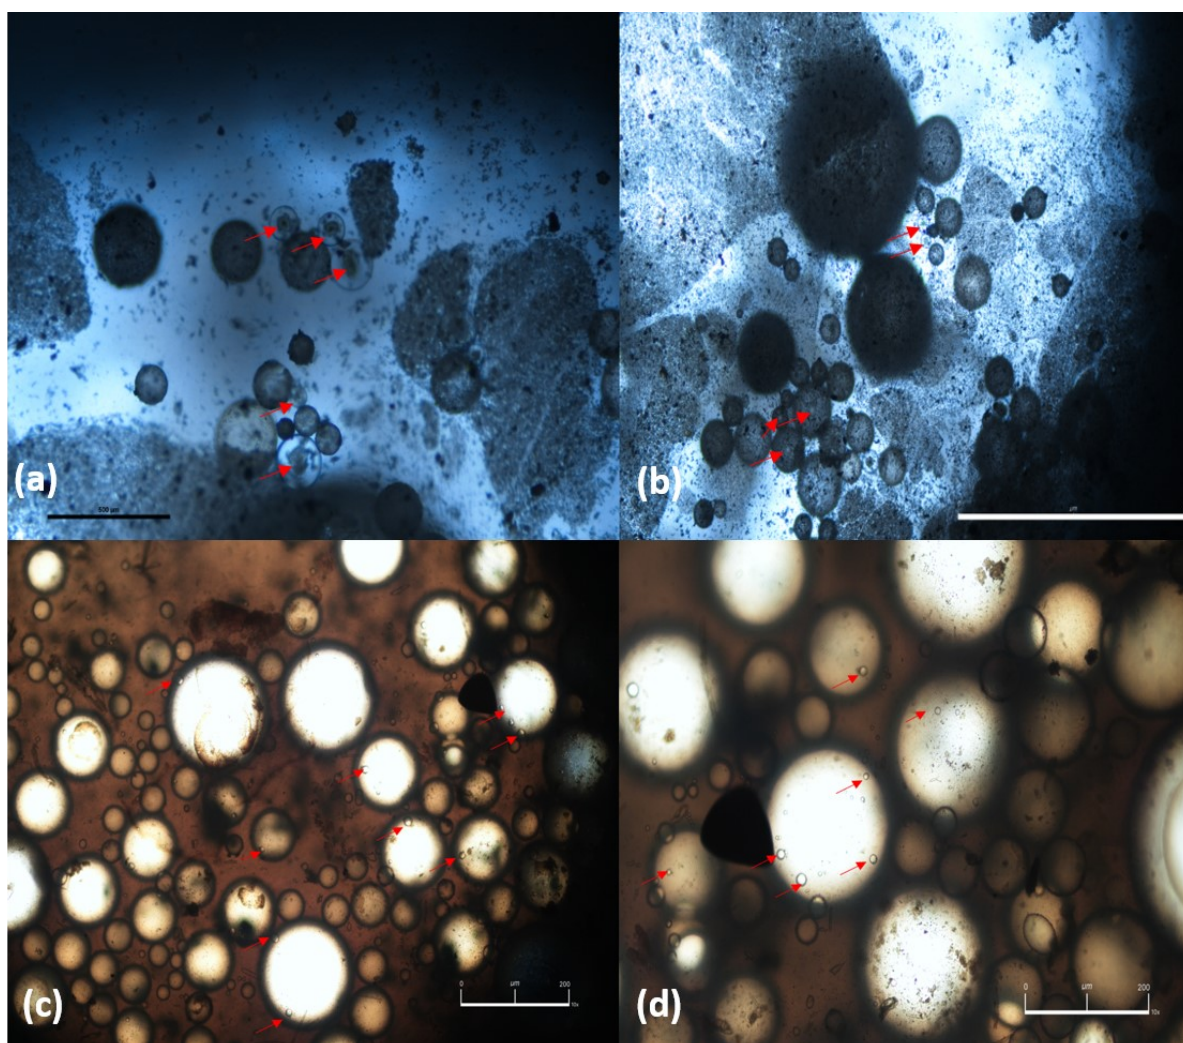

**Fig. S8** Microscopic observation of o/w Pickering emulsion in Ru/TiO<sub>2</sub>. (a-b) 2wt % Ru/TiO<sub>2</sub>-np-400 (c-d) 2wt % Ru/TiO<sub>2</sub>-P2-400 The red arrow indicating the location of H<sub>2</sub> bubbles



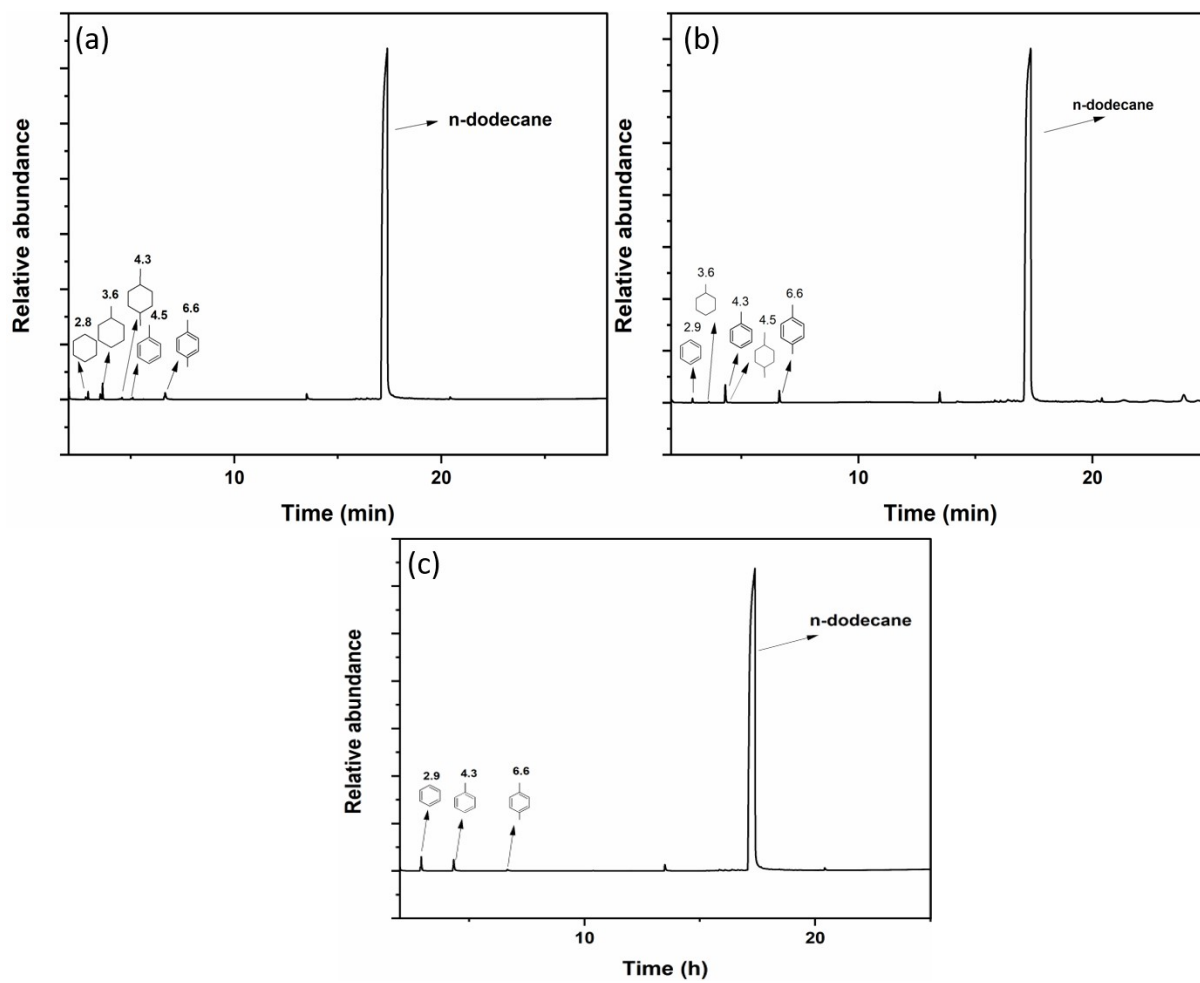

**Fig. S9** GC-MS chromatogram of the PET HDO catalyst in biphasic system, a) 2 wt% Ru/TiO<sub>2</sub>-np-400, b) 2 wt% Ru/TiO<sub>2</sub>-P2-400, c) 2 wt% Ru/TiO<sub>2</sub>-meso-400.

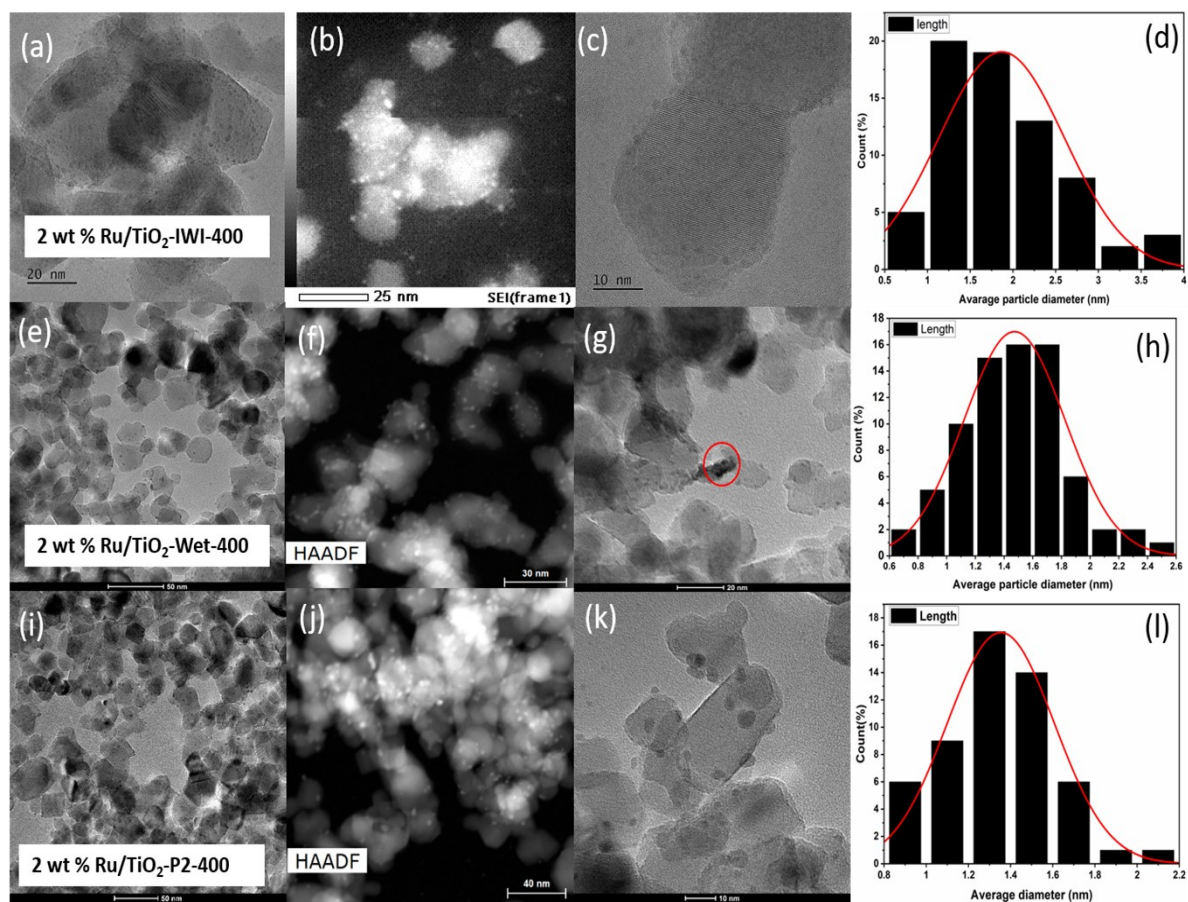

**Fig. S10** TEM and STEM images of Ru/TiO<sub>2</sub> catalysts fabricated using different methods: (a–c) 2 wt% Ru/TiO<sub>2</sub>-IWI-400, (e–g) 2 wt% Ru/TiO<sub>2</sub>-Wet-400, (i–k) 2 wt% Ru/TiO<sub>2</sub>-P2-400, and (d,h,i) corresponding particle size histograms.

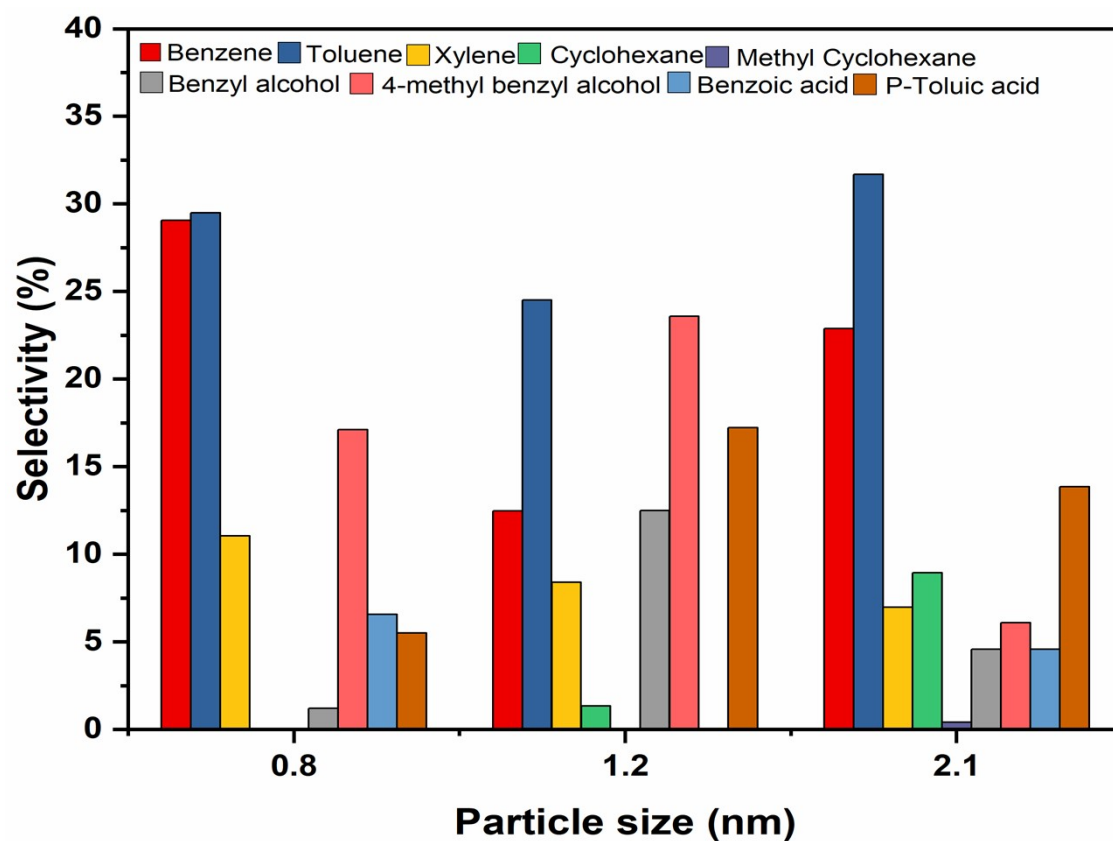

**Fig. S11** Selectivities for major products as a function of Ru particle size at ~50 % PET conversion. Reaction conditions: 0.5 of g catalyst, 0.5 g of PET, 50 g of water + *n*-dodecane, 220 °C, 10 bar H<sub>2</sub>, 8 h

**Table S5** Solubility of different intermediate products in water and dodecane medium.

| No. | Products               | Solubility in water medium | Solubility in dodecane medium |
|-----|------------------------|----------------------------|-------------------------------|
| 1   | Terepathallic acid     | Insoluble                  | Insoluble                     |
| 2   | Benzoic acid           | Slightly soluble           | Soluble                       |
| 3   | 4-Methylbenzyl alcohol | Slightly soluble           | Soluble                       |
| 4   | Benzyl alcohol         | Slightly soluble           | Soluble                       |
| 5   | Dimethyl cyclohexane   | Insoluble                  | Soluble                       |
| 6   | Methyl cyclohexane     | Insoluble                  | Soluble                       |
| 7   | Cyclohexane            | Insoluble                  | Soluble                       |
| 8   | Toluene                | Insoluble                  | Soluble                       |
| 9   | Xylene                 | Insoluble                  | Soluble                       |
| 10  | p-Toluic acid          | Insoluble                  | Soluble                       |

**Table S6** Surface area of different TiO<sub>2</sub> supports

| Catalyst               | $S_{\text{BET}}$<br>(m <sup>2</sup> /g) | $V_{\text{pore}}$<br>(cm <sup>3</sup> /g) | $V_{\text{micro}}$<br>(cm <sup>3</sup> /g) | $V_{\text{meso}}$<br>(cm <sup>3</sup> /g) | $D_{\text{meso}}$<br>(nm) |
|------------------------|-----------------------------------------|-------------------------------------------|--------------------------------------------|-------------------------------------------|---------------------------|
| TiO <sub>2</sub> -np   | 84.12                                   | 0.33                                      | 0.13                                       | 0.2                                       | 9.42                      |
| TiO <sub>2</sub> -meso | 78.74                                   | 0.44                                      | 0.16                                       | 0.28                                      | 12.93.                    |
| TiO <sub>2</sub> -P25  | 41.48                                   | 0.35                                      | 0.1                                        | 0.34                                      | 25.29                     |

- $S_{\text{BET}}$ : BET surface area

- $V_{\text{pore}}$ : Single-point-desorption total pore volume ( $P/P_0 = 0.99$ ).

- $V_{\text{micro}}$ : Single-point-desorption micropore volume ( $P/P_0 = 0.20$ ).

- $V_{\text{meso}}$ :  $V_{\text{pore}} - V_{\text{micro}}$

- $D_{\text{meso}}$ : Mean mesopore diameter obtained via the BJH method.

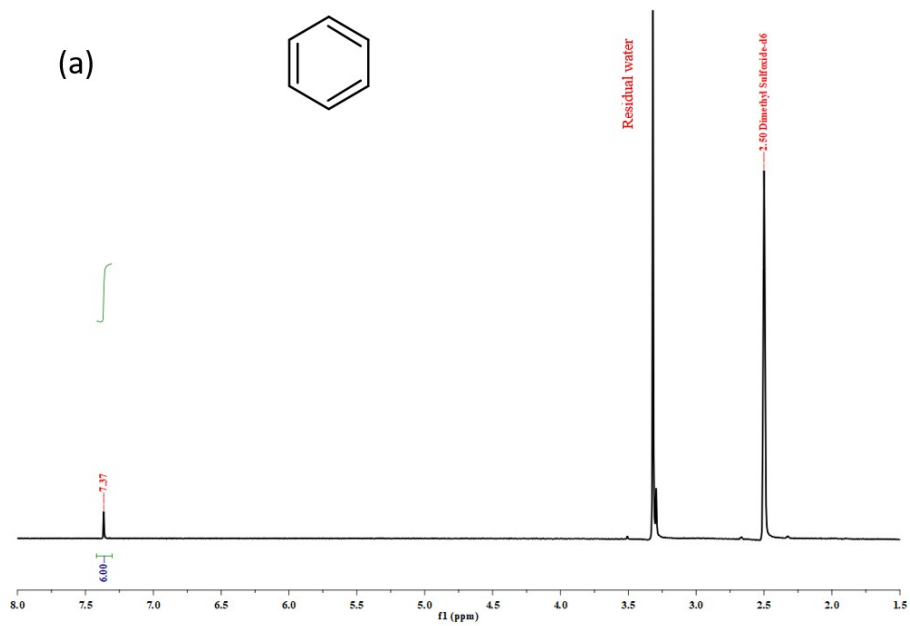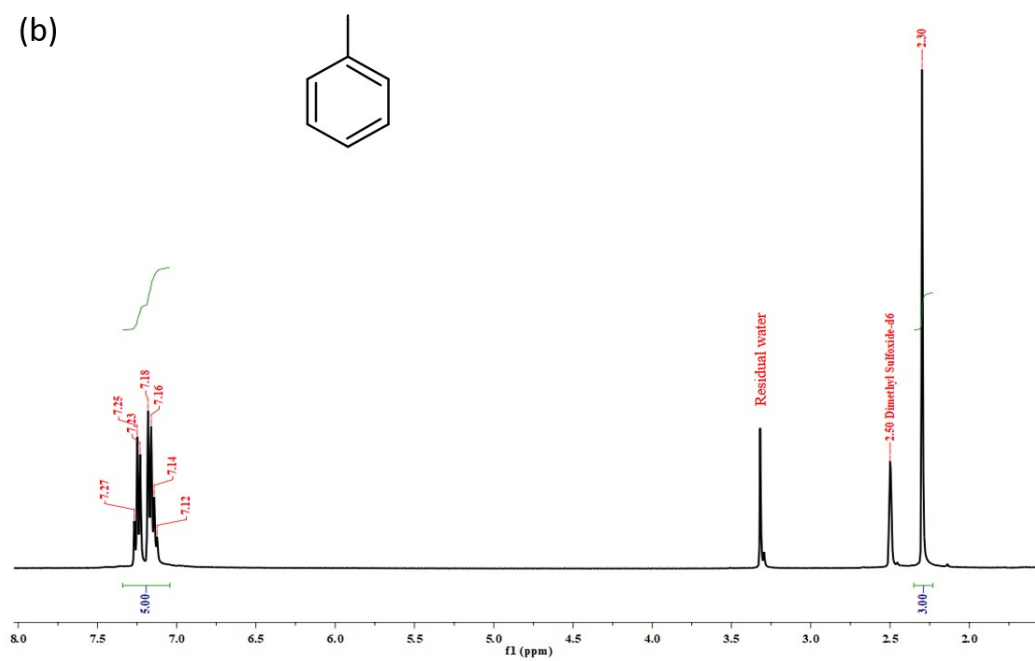

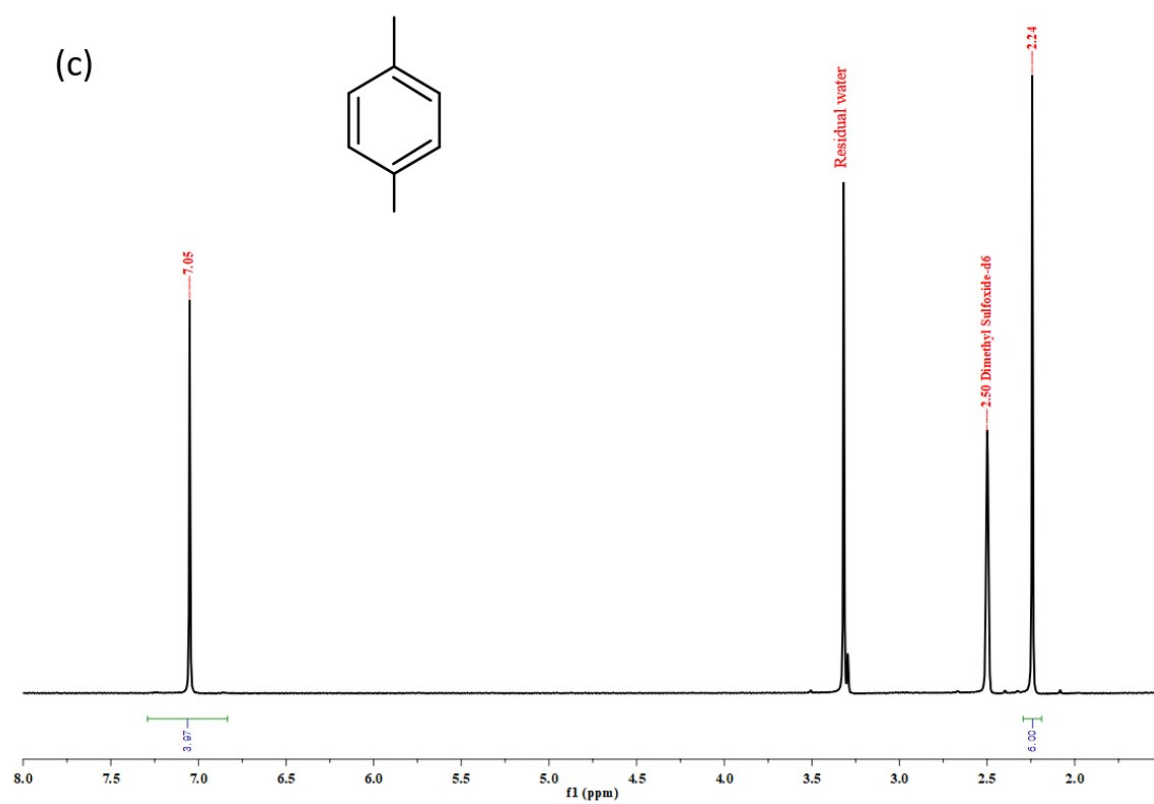

**Fig. S12**  $^1\text{H}$  NMR spectrum of BTX after product separation, a) Benzene, b) Toluene, c) Xylene dissolved in Dimethyl sulfoxide- $\text{d}_6$ .



**Table S7** Summary of main results in literature and parallel work for PET conversion.

| Catalyst                             | Temp (°C) | Reaction time (min) | Solvent /PET mass ratio | Catalyst /PET mass ratio | Products   | Yield of arenes/C6-C8 cyclic hydrocarbons (%) | Energy economy (ε) (°C <sup>-1</sup> *min <sup>-1</sup> ) | Environmental factor (E) (a.u) | Carbon Footprint analysis (Kg of tCO <sub>2</sub> /ton waste) | Environmental Energy Impact (ξ)(°C*min) | Ref.          |
|--------------------------------------|-----------|---------------------|-------------------------|--------------------------|------------|-----------------------------------------------|-----------------------------------------------------------|--------------------------------|---------------------------------------------------------------|-----------------------------------------|---------------|
| Ru/TiO <sub>2</sub>                  | 220       | 720                 | 50                      | 1                        | Arenes     | 89.34                                         | 5.55E-04                                                  | 13.21                          | 3.38                                                          | 23801.80                                | This work     |
| Ru/TiO <sub>2</sub>                  | 220       | 720                 | 50                      | 1                        | Naphthenes | 87.92                                         | 5.55E-04                                                  | 15.04                          | 3.22                                                          | 27099.10                                | Previous work |
| Ru/Nb <sub>2</sub> O <sub>5</sub>    | 200       | 720                 | 100                     | 1                        | Arenes     | 87.01                                         | 5.68E-04                                                  | 22.36                          | 3.19                                                          | 39353.6                                 | 5             |
| Ru/ZrO <sub>2</sub>                  | 200       | 720                 | 100                     | 1                        | Arenes     | 40                                            | 2.52E-04                                                  | 48.64                          | 1.46                                                          | 193016.0                                | 5             |
| Ru/Nb <sub>2</sub> O <sub>5</sub>    | 320       | 960                 | 66.6                    | 1                        | Arenes     | 78.9                                          | 2.57E-04                                                  | 22.40                          | 2.89                                                          | 87238.57                                | 5             |
| Ru/Cu/SiO <sub>2</sub>               | 400       | 1320                | 40                      | 0.25                     | Naphthenes | 94                                            | 1.78E-04                                                  | 17.29                          | 3.44                                                          | 97134.83                                | 6             |
| Ru/NiAl <sub>2</sub> /O <sub>3</sub> | 220       | 720                 | 75                      | 1                        | Arenes     | 65                                            | 4.10E-04                                                  | 30.30                          | 2.38                                                          | 109393.14                               | 7             |
| Ru/Nb <sub>2</sub> O <sub>5</sub>    | 220       | 720                 | 75                      | 1                        | Arenes     | 85                                            | 5.37E-04                                                  | 22.63                          | 3.11                                                          | 42189.19                                | 7             |
| Nickel phosphate                     | 400       | 360                 | 10                      | 0.6                      | Arenes     | 84                                            | 5.34E-04                                                  | 33.68                          | 3.08                                                          | 63071.2                                 | 8             |

<Calculation method>

T is the reaction temperature in degrees Celsius, Y is the yield of the main monomer in mass fraction, t is the reaction time (in minutes). MM and m represent the molar mass (g mol<sup>-1</sup>) and mass (g) of the polymers respectively.

$$\varepsilon = \frac{y}{T * t} \quad (5)$$

$$E_{factor} = \frac{\left[ 0.1 \times \left( \frac{solvent}{PET} ratio \right) + \left( \frac{catalyst}{PET} ratio \right) + \left( \frac{other\ subst}{PET} ratio \right) \right] \times m_{PET}}{m_{Product}} \quad (6)$$

$$m_{Product} = yield_{Product} \times \frac{MM_{Product} E}{MM_{PET}} \times m_{PET} \quad (7)$$

Combine equation (2) and (3)

$$E_{factor} = \frac{\left[ 0.1 \times \left( \frac{solvent}{PET} ratio \right) + \left( \frac{catalyst}{PET} ratio \right) + \left( \frac{other\ subst}{PET} ratio \right) \right] \times m_{PET}}{yield_{Product} \times \frac{MM_{Product} E}{MM_{PET}} \times m_{PET}} \quad (8)$$

$$\xi = \frac{E_{factor}}{\varepsilon} \quad (9)$$

Carbon foot print anaylsis

$$= \frac{(Yield\ of\ product\ in\ wt\ \% * molar\ mass\ of\ CO_2)}{molar\ mass\ of\ C} \quad (10)$$

## Reference

1. V. Murali, J. R. Kim, Y.-K. Park, J.-M. Ha and J. Jae, *Green Chemistry*, 2023, **25**, 8570-8583.
2. L. Snyder, *Journal of Chromatography A*, 1974, **92**, 223-230.
3. J. He, C. Zhao and J. A. Lercher, *Journal of catalysis*, 2014, **309**, 362-375.
4. M. A. Matthews, J. B. Rodden and A. Akgerman, *Journal of Chemical and Engineering Data*, 1987, **32**, 319-322.
5. Y. Jing, Y. Wang, S. Furukawa, J. Xia, C. Sun, M. J. Hülsey, H. Wang, Y. Guo, X. Liu and N. Yan, *Angewandte Chemie International Edition*, 2021, **60**, 5527-5535.
6. H. Tang, N. Li, G. Li, A. Wang, Y. Cong, G. Xu, X. Wang and T. Zhang, *Green Chemistry*, 2019, **21**, 2709-2719.
7. S. Lu, Y. Jing, B. Feng, Y. Guo, X. Liu and Y. Wang, *ChemSusChem*, 2021, **14**, 4242-4250.
8. M. Golubeva, M. Mukhtarova, A. Sadovnikov and A. Maximov, *Polymers*, 2023, **15**, 2248.
